# Supplementary material for: Structural and near-IR photophysical studies on ternary lanthanide complexes containing poly(pyrazolyl)borate and 1,3-diketonate ligands
Source: Royal Society of Chemistry journal article supplement (doi:10.1039/b400992d), 2004-01-01

Structural and near-infrared photophysical studies on ternary lanthanide complexes containing poly(pyrazolyl)borate and 1,3-diketonate ligands

Graham M. Davies,<sup>a,b</sup> Rebecca J. Aarons,<sup>c</sup> Graham R. Motson,<sup>b</sup> John C. Jeffery,<sup>b</sup> Harry Adams,<sup>a</sup> Stephen Faulkner<sup>c,\*</sup> and Michael D. Ward<sup>a,\*</sup>

Electronic Supporting Information: Tables S1 – S8 and figure S1.

Table S1: Coordination-sphere bond lengths and angles for  $[\text{Nd}(\text{L}^2)_2(\text{dbm})_2]$ 

|              |          |              |          |
|--------------|----------|--------------|----------|
| Nd(1)-O(115) | 2.354(3) | Nd(2)-O(241) | 2.377(3) |
| Nd(1)-O(141) | 2.372(4) | Nd(2)-O(215) | 2.380(3) |
| Nd(1)-O(111) | 2.400(3) | Nd(2)-O(245) | 2.383(3) |
| Nd(1)-O(145) | 2.422(4) | Nd(2)-O(211) | 2.390(3) |
| Nd(1)-N(162) | 2.573(4) | Nd(2)-N(262) | 2.557(4) |
| Nd(1)-N(171) | 2.607(4) | Nd(2)-N(282) | 2.584(4) |
| Nd(1)-N(182) | 2.607(4) | Nd(2)-N(291) | 2.603(5) |
| Nd(1)-N(191) | 2.644(4) | Nd(2)-N(271) | 2.636(5) |

|                     |            |                     |            |
|---------------------|------------|---------------------|------------|
| O(115)-Nd(1)-O(141) | 149.66(12) | O(241)-Nd(2)-O(215) | 142.26(11) |
| O(115)-Nd(1)-O(111) | 69.23(12)  | O(241)-Nd(2)-O(245) | 69.22(11)  |
| O(141)-Nd(1)-O(111) | 140.63(12) | O(215)-Nd(2)-O(245) | 148.42(11) |
| O(115)-Nd(1)-O(145) | 133.54(12) | O(241)-Nd(2)-O(211) | 72.75(11)  |
| O(141)-Nd(1)-O(145) | 69.72(12)  | O(215)-Nd(2)-O(211) | 69.67(11)  |
| O(111)-Nd(1)-O(145) | 73.50(12)  | O(245)-Nd(2)-O(211) | 141.91(11) |
| O(115)-Nd(1)-N(162) | 90.36(13)  | O(241)-Nd(2)-N(262) | 122.68(13) |
| O(141)-Nd(1)-N(162) | 75.27(13)  | O(215)-Nd(2)-N(262) | 82.32(13)  |
| O(111)-Nd(1)-N(162) | 125.41(13) | O(245)-Nd(2)-N(262) | 73.11(13)  |
| O(145)-Nd(1)-N(162) | 134.55(12) | O(211)-Nd(2)-N(262) | 132.67(13) |
| O(115)-Nd(1)-N(171) | 111.01(13) | O(241)-Nd(2)-N(282) | 126.25(13) |
| O(141)-Nd(1)-N(171) | 86.71(13)  | O(215)-Nd(2)-N(282) | 84.15(12)  |
| O(111)-Nd(1)-N(171) | 77.06(13)  | O(245)-Nd(2)-N(282) | 71.26(12)  |
| O(145)-Nd(1)-N(171) | 85.92(13)  | O(211)-Nd(2)-N(282) | 134.07(13) |
| N(162)-Nd(1)-N(171) | 63.70(13)  | N(262)-Nd(2)-N(282) | 76.61(14)  |
| O(115)-Nd(1)-N(182) | 74.15(12)  | O(241)-Nd(2)-N(291) | 79.02(13)  |
| O(141)-Nd(1)-N(182) | 76.20(12)  | O(215)-Nd(2)-N(291) | 101.00(13) |
| O(111)-Nd(1)-N(182) | 137.89(12) | O(245)-Nd(2)-N(291) | 85.41(13)  |
| O(145)-Nd(1)-N(182) | 122.47(13) | O(211)-Nd(2)-N(291) | 85.33(13)  |
| N(162)-Nd(1)-N(182) | 73.85(14)  | N(262)-Nd(2)-N(291) | 138.49(13) |
| N(171)-Nd(1)-N(182) | 137.05(13) | N(282)-Nd(2)-N(291) | 62.82(13)  |
| O(115)-Nd(1)-N(191) | 80.85(13)  | O(241)-Nd(2)-N(271) | 74.64(12)  |
| O(141)-Nd(1)-N(191) | 91.22(13)  | O(215)-Nd(2)-N(271) | 97.27(13)  |
| O(111)-Nd(1)-N(191) | 91.23(13)  | O(245)-Nd(2)-N(271) | 89.13(13)  |
| O(145)-Nd(1)-N(191) | 73.14(12)  | O(211)-Nd(2)-N(271) | 82.98(13)  |
| N(162)-Nd(1)-N(191) | 136.35(13) | N(262)-Nd(2)-N(271) | 63.10(13)  |
| N(171)-Nd(1)-N(191) | 158.30(13) | N(282)-Nd(2)-N(271) | 138.97(13) |
| N(182)-Nd(1)-N(191) | 62.59(13)  | N(291)-Nd(2)-N(271) | 153.33(13) |

Table S2: Coordination-sphere bond lengths and angles for  $[\text{Er}(\text{L}^2)_2(\text{dbm})_2]$ 

|              |          |              |          |
|--------------|----------|--------------|----------|
| Er(1)-O(145) | 2.264(6) | Er(2)-O(245) | 2.263(6) |
| Er(1)-O(111) | 2.278(6) | Er(2)-O(212) | 2.264(6) |
| Er(1)-O(115) | 2.286(6) | Er(2)-O(241) | 2.311(6) |
| Er(1)-O(141) | 2.301(6) | Er(2)-O(215) | 2.316(6) |
| Er(1)-N(182) | 2.462(7) | Er(2)-N(262) | 2.473(7) |
| Er(1)-N(162) | 2.469(7) | Er(2)-N(282) | 2.480(8) |
| Er(1)-N(171) | 2.508(8) | Er(2)-N(271) | 2.486(8) |
| Er(1)-N(191) | 2.525(8) | Er(2)-N(291) | 2.513(8) |

|                     |          |                     |          |
|---------------------|----------|---------------------|----------|
| O(145)-Er(1)-O(111) | 143.8(2) | O(245)-Er(2)-O(212) | 146.5(2) |
| O(145)-Er(1)-O(115) | 144.4(2) | O(245)-Er(2)-O(241) | 72.1(2)  |
| O(111)-Er(1)-O(115) | 71.7(2)  | O(212)-Er(2)-O(241) | 141.2(2) |
| O(145)-Er(1)-O(141) | 72.5(2)  | O(245)-Er(2)-O(215) | 137.7(2) |
| O(111)-Er(1)-O(141) | 143.7(2) | O(212)-Er(2)-O(215) | 71.5(2)  |
| O(115)-Er(1)-O(141) | 72.0(2)  | O(241)-Er(2)-O(215) | 71.1(2)  |
| O(145)-Er(1)-N(182) | 78.9(2)  | O(245)-Er(2)-N(262) | 86.6(2)  |
| O(111)-Er(1)-N(182) | 73.4(2)  | O(212)-Er(2)-N(262) | 74.3(2)  |
| O(115)-Er(1)-N(182) | 125.4(2) | O(241)-Er(2)-N(262) | 127.4(2) |
| O(141)-Er(1)-N(182) | 131.1(2) | O(215)-Er(2)-N(262) | 132.8(2) |
| O(145)-Er(1)-N(162) | 80.4(2)  | O(245)-Er(2)-N(282) | 73.4(2)  |
| O(111)-Er(1)-N(162) | 71.2(2)  | O(212)-Er(2)-N(282) | 75.2(2)  |
| O(115)-Er(1)-N(162) | 126.8(2) | O(241)-Er(2)-N(282) | 136.6(2) |
| O(141)-Er(1)-N(162) | 133.4(2) | O(215)-Er(2)-N(282) | 124.3(2) |
| N(182)-Er(1)-N(162) | 77.0(3)  | N(262)-Er(2)-N(282) | 75.1(3)  |
| O(145)-Er(1)-N(171) | 99.9(3)  | O(245)-Er(2)-N(271) | 109.8(2) |
| O(111)-Er(1)-N(171) | 88.3(2)  | O(212)-Er(2)-N(271) | 87.6(2)  |
| O(115)-Er(1)-N(171) | 77.0(2)  | O(241)-Er(2)-N(271) | 76.8(2)  |
| O(141)-Er(1)-N(171) | 82.8(2)  | O(215)-Er(2)-N(271) | 80.9(2)  |
| N(182)-Er(1)-N(171) | 141.6(3) | N(262)-Er(2)-N(271) | 66.1(3)  |
| N(162)-Er(1)-N(171) | 65.1(3)  | N(282)-Er(2)-N(271) | 140.6(3) |
| O(145)-Er(1)-N(191) | 98.7(2)  | O(245)-Er(2)-N(291) | 83.2(2)  |
| O(111)-Er(1)-N(191) | 90.7(3)  | O(212)-Er(2)-N(291) | 93.9(2)  |
| O(115)-Er(1)-N(191) | 73.9(2)  | O(241)-Er(2)-N(291) | 85.5(2)  |
| O(141)-Er(1)-N(191) | 80.1(2)  | O(215)-Er(2)-N(291) | 74.0(2)  |
| N(182)-Er(1)-N(191) | 65.9(3)  | N(262)-Er(2)-N(291) | 140.1(3) |
| N(162)-Er(1)-N(191) | 142.2(3) | N(282)-Er(2)-N(291) | 65.1(3)  |
| N(171)-Er(1)-N(191) | 149.6(3) | N(271)-Er(2)-N(291) | 152.9(3) |

Table S3: Coordination-sphere bond lengths and angles for  $[\text{Pr}(\text{L}^2)_2(\text{dbm})_2]$ 

|              |          |              |          |
|--------------|----------|--------------|----------|
| Pr(1)-O(145) | 2.390(2) | Pr(2)-O(211) | 2.357(2) |
| Pr(1)-O(111) | 2.391(2) | Pr(2)-O(245) | 2.380(2) |
| Pr(1)-O(115) | 2.397(2) | Pr(2)-O(215) | 2.423(2) |
| Pr(1)-O(141) | 2.403(2) | Pr(2)-O(241) | 2.436(2) |
| Pr(1)-N(182) | 2.589(3) | Pr(2)-N(282) | 2.592(3) |
| Pr(1)-N(162) | 2.603(3) | Pr(2)-N(262) | 2.624(3) |
| Pr(1)-N(171) | 2.627(3) | Pr(2)-N(291) | 2.633(3) |
| Pr(1)-N(191) | 2.656(3) | Pr(2)-N(271) | 2.659(2) |

|                     |           |                     |           |
|---------------------|-----------|---------------------|-----------|
| O(145)-Pr(1)-O(111) | 149.00(7) | O(211)-Pr(2)-O(245) | 149.77(8) |
| O(145)-Pr(1)-O(115) | 142.20(7) | O(211)-Pr(2)-O(215) | 68.91(7)  |
| O(111)-Pr(1)-O(115) | 68.72(7)  | O(245)-Pr(2)-O(215) | 140.74(7) |
| O(145)-Pr(1)-O(141) | 69.32(7)  | O(211)-Pr(2)-O(241) | 133.61(7) |
| O(111)-Pr(1)-O(141) | 141.68(7) | O(245)-Pr(2)-O(241) | 69.08(7)  |
| O(115)-Pr(1)-O(141) | 73.05(7)  | O(215)-Pr(2)-O(241) | 74.21(7)  |
| O(145)-Pr(1)-N(182) | 82.20(8)  | O(211)-Pr(2)-N(282) | 90.56(8)  |
| O(111)-Pr(1)-N(182) | 73.78(8)  | O(245)-Pr(2)-N(282) | 75.72(8)  |
| O(115)-Pr(1)-N(182) | 122.80(8) | O(215)-Pr(2)-N(282) | 124.98(8) |
| O(141)-Pr(1)-N(182) | 132.46(8) | O(241)-Pr(2)-N(282) | 134.38(8) |
| O(145)-Pr(1)-N(162) | 84.20(7)  | O(211)-Pr(2)-N(262) | 74.28(8)  |
| O(111)-Pr(1)-N(162) | 71.45(8)  | O(245)-Pr(2)-N(262) | 76.02(8)  |
| O(115)-Pr(1)-N(162) | 126.36(7) | O(215)-Pr(2)-N(262) | 138.08(8) |
| O(141)-Pr(1)-N(162) | 134.03(8) | O(241)-Pr(2)-N(262) | 122.30(8) |
| N(182)-Pr(1)-N(162) | 76.39(8)  | N(282)-Pr(2)-N(262) | 73.63(8)  |
| O(145)-Pr(1)-N(171) | 101.19(8) | O(211)-Pr(2)-N(291) | 110.58(8) |
| O(111)-Pr(1)-N(171) | 84.57(8)  | O(245)-Pr(2)-N(291) | 87.38(8)  |
| O(115)-Pr(1)-N(171) | 79.35(8)  | O(215)-Pr(2)-N(291) | 76.97(8)  |
| O(141)-Pr(1)-N(171) | 86.08(8)  | O(241)-Pr(2)-N(291) | 86.73(8)  |
| N(182)-Pr(1)-N(171) | 137.80(8) | N(282)-Pr(2)-N(291) | 63.16(8)  |
| N(162)-Pr(1)-N(171) | 62.36(8)  | N(262)-Pr(2)-N(291) | 136.35(8) |
| O(145)-Pr(1)-N(191) | 96.88(8)  | O(211)-Pr(2)-N(271) | 80.92(8)  |
| O(111)-Pr(1)-N(191) | 89.32(8)  | O(245)-Pr(2)-N(271) | 90.25(8)  |
| O(115)-Pr(1)-N(191) | 75.17(8)  | O(215)-Pr(2)-N(271) | 92.25(8)  |
| O(141)-Pr(1)-N(191) | 83.34(8)  | O(241)-Pr(2)-N(271) | 73.30(8)  |
| N(182)-Pr(1)-N(191) | 62.64(8)  | N(282)-Pr(2)-N(271) | 135.75(8) |
| N(162)-Pr(1)-N(191) | 138.33(8) | N(262)-Pr(2)-N(271) | 62.23(8)  |
| N(171)-Pr(1)-N(191) | 154.29(8) | N(291)-Pr(2)-N(271) | 159.36(8) |

Table S4: Coordination-sphere bond lengths and angles for [Eu(L<sup>2</sup>)<sub>2</sub>(dbm)<sub>2</sub>]

|              |            |              |            |
|--------------|------------|--------------|------------|
| Eu(1)-O(115) | 2.3102(15) | Eu(2)-O(215) | 2.3336(15) |
| Eu(1)-O(145) | 2.3222(15) | Eu(2)-O(245) | 2.3357(15) |
| Eu(1)-O(111) | 2.3685(14) | Eu(2)-O(241) | 2.3430(15) |
| Eu(1)-O(141) | 2.3788(14) | Eu(2)-O(211) | 2.3585(15) |
| Eu(1)-N(172) | 2.5259(19) | Eu(2)-N(272) | 2.5256(18) |
| Eu(1)-N(182) | 2.5506(19) | Eu(2)-N(282) | 2.5412(18) |
| Eu(1)-N(161) | 2.562(2)   | Eu(2)-N(291) | 2.5651(18) |
| Eu(1)-N(191) | 2.584(2)   | Eu(2)-N(261) | 2.5912(18) |

|                     |           |                     |           |
|---------------------|-----------|---------------------|-----------|
| O(115)-Eu(1)-O(145) | 148.28(5) | O(215)-Eu(2)-O(245) | 146.61(5) |
| O(115)-Eu(1)-O(111) | 70.46(5)  | O(215)-Eu(2)-O(241) | 143.02(5) |
| O(145)-Eu(1)-O(111) | 140.88(5) | O(245)-Eu(2)-O(241) | 70.31(5)  |
| O(115)-Eu(1)-O(141) | 135.79(5) | O(215)-Eu(2)-O(211) | 70.85(5)  |
| O(145)-Eu(1)-O(141) | 70.29(5)  | O(245)-Eu(2)-O(211) | 142.54(5) |
| O(111)-Eu(1)-O(141) | 72.49(5)  | O(241)-Eu(2)-O(211) | 72.27(5)  |
| O(115)-Eu(1)-N(172) | 88.68(6)  | O(215)-Eu(2)-N(272) | 81.08(6)  |
| O(145)-Eu(1)-N(172) | 74.90(6)  | O(245)-Eu(2)-N(272) | 72.98(6)  |
| O(111)-Eu(1)-N(172) | 126.32(6) | O(241)-Eu(2)-N(272) | 123.79(5) |
| O(141)-Eu(1)-N(172) | 133.42(6) | O(211)-Eu(2)-N(272) | 132.39(6) |
| O(115)-Eu(1)-N(182) | 73.40(5)  | O(215)-Eu(2)-N(282) | 82.60(6)  |
| O(145)-Eu(1)-N(182) | 76.11(6)  | O(245)-Eu(2)-N(282) | 71.41(6)  |
| O(111)-Eu(1)-N(182) | 136.92(6) | O(241)-Eu(2)-N(282) | 126.54(6) |
| O(141)-Eu(1)-N(182) | 123.63(5) | O(211)-Eu(2)-N(282) | 133.57(6) |
| N(172)-Eu(1)-N(182) | 74.58(6)  | N(272)-Eu(2)-N(282) | 76.76(6)  |
| O(115)-Eu(1)-N(161) | 110.46(6) | O(215)-Eu(2)-N(291) | 100.52(6) |
| O(145)-Eu(1)-N(161) | 87.06(6)  | O(245)-Eu(2)-N(291) | 86.73(6)  |
| O(111)-Eu(1)-N(161) | 77.12(6)  | O(241)-Eu(2)-N(291) | 78.07(6)  |
| O(141)-Eu(1)-N(161) | 83.42(6)  | O(211)-Eu(2)-N(291) | 83.99(6)  |
| N(172)-Eu(1)-N(161) | 64.60(6)  | N(272)-Eu(2)-N(291) | 139.81(6) |
| N(182)-Eu(1)-N(161) | 138.68(6) | N(282)-Eu(2)-N(291) | 63.83(6)  |
| O(115)-Eu(1)-N(191) | 81.92(6)  | O(215)-Eu(2)-N(261) | 97.39(6)  |
| O(145)-Eu(1)-N(191) | 92.23(6)  | O(245)-Eu(2)-N(261) | 89.96(6)  |
| O(111)-Eu(1)-N(191) | 88.78(6)  | O(241)-Eu(2)-N(261) | 74.77(6)  |
| O(141)-Eu(1)-N(191) | 73.97(6)  | O(211)-Eu(2)-N(261) | 81.93(6)  |
| N(172)-Eu(1)-N(191) | 137.93(6) | N(272)-Eu(2)-N(261) | 64.10(6)  |
| N(182)-Eu(1)-N(191) | 63.42(6)  | N(282)-Eu(2)-N(261) | 140.24(6) |
| N(161)-Eu(1)-N(191) | 156.17(6) | N(291)-Eu(2)-N(261) | 152.13(6) |

Table S5: Coordination-sphere bond lengths and angles for  $[\text{Gd}(\text{L}^2)_2(\text{dbm})_2]$ 

|              |          |              |          |
|--------------|----------|--------------|----------|
| Gd(1)-O(145) | 2.333(2) | Gd(2)-O(215) | 2.307(2) |
| Gd(1)-O(111) | 2.336(2) | Gd(2)-O(245) | 2.318(2) |
| Gd(1)-O(141) | 2.339(2) | Gd(2)-O(211) | 2.355(2) |
| Gd(1)-O(115) | 2.346(2) | Gd(2)-O(241) | 2.369(2) |
| Gd(1)-N(182) | 2.505(3) | Gd(2)-N(262) | 2.513(3) |
| Gd(1)-N(162) | 2.529(3) | Gd(2)-N(282) | 2.538(3) |
| Gd(1)-N(171) | 2.537(3) | Gd(2)-N(271) | 2.546(3) |
| Gd(1)-N(191) | 2.566(3) | Gd(2)-N(291) | 2.576(3) |

|                     |           |                     |           |
|---------------------|-----------|---------------------|-----------|
| O(145)-Gd(1)-O(111) | 145.80(8) | O(215)-Gd(2)-O(245) | 147.86(8) |
| O(145)-Gd(1)-O(141) | 70.57(8)  | O(215)-Gd(2)-O(211) | 70.64(8)  |
| O(111)-Gd(1)-O(141) | 143.59(8) | O(245)-Gd(2)-O(211) | 141.12(8) |
| O(145)-Gd(1)-O(115) | 143.05(8) | O(215)-Gd(2)-O(241) | 136.11(8) |
| O(111)-Gd(1)-O(115) | 71.14(8)  | O(245)-Gd(2)-O(241) | 70.58(8)  |
| O(141)-Gd(1)-O(115) | 72.54(8)  | O(211)-Gd(2)-O(241) | 72.25(8)  |
| O(145)-Gd(1)-N(182) | 73.04(9)  | O(215)-Gd(2)-N(262) | 88.24(9)  |
| O(111)-Gd(1)-N(182) | 80.83(9)  | O(245)-Gd(2)-N(262) | 75.10(9)  |
| O(141)-Gd(1)-N(182) | 123.40(9) | O(211)-Gd(2)-N(262) | 126.17(9) |
| O(115)-Gd(1)-N(182) | 131.94(9) | O(241)-Gd(2)-N(262) | 133.30(9) |
| O(145)-Gd(1)-N(162) | 71.00(9)  | O(215)-Gd(2)-N(282) | 73.49(9)  |
| O(111)-Gd(1)-N(162) | 82.05(8)  | O(245)-Gd(2)-N(282) | 75.71(9)  |
| O(141)-Gd(1)-N(162) | 126.74(8) | O(211)-Gd(2)-N(282) | 136.81(9) |
| O(115)-Gd(1)-N(162) | 133.60(9) | O(241)-Gd(2)-N(282) | 123.69(8) |
| N(182)-Gd(1)-N(162) | 76.98(9)  | N(262)-Gd(2)-N(282) | 75.05(9)  |
| O(145)-Gd(1)-N(171) | 86.97(9)  | O(215)-Gd(2)-N(271) | 110.13(9) |
| O(111)-Gd(1)-N(171) | 100.11(9) | O(245)-Gd(2)-N(271) | 87.61(9)  |
| O(141)-Gd(1)-N(171) | 78.35(9)  | O(211)-Gd(2)-N(271) | 76.89(9)  |
| O(115)-Gd(1)-N(171) | 83.73(9)  | O(241)-Gd(2)-N(271) | 82.97(8)  |
| N(182)-Gd(1)-N(171) | 140.44(9) | N(262)-Gd(2)-N(271) | 64.70(9)  |
| N(162)-Gd(1)-N(171) | 64.18(9)  | N(282)-Gd(2)-N(271) | 139.23(9) |
| O(145)-Gd(1)-N(191) | 91.34(9)  | O(215)-Gd(2)-N(291) | 82.48(9)  |
| O(111)-Gd(1)-N(191) | 96.91(9)  | O(245)-Gd(2)-N(291) | 92.03(9)  |
| O(141)-Gd(1)-N(191) | 74.74(9)  | O(211)-Gd(2)-N(291) | 88.30(9)  |
| O(115)-Gd(1)-N(191) | 80.93(9)  | O(241)-Gd(2)-N(291) | 73.79(8)  |
| N(182)-Gd(1)-N(191) | 64.31(9)  | N(262)-Gd(2)-N(291) | 138.65(9) |
| N(162)-Gd(1)-N(191) | 140.83(9) | N(282)-Gd(2)-N(291) | 63.66(9)  |
| N(171)-Gd(1)-N(191) | 151.98(9) | N(271)-Gd(2)-N(291) | 155.43(9) |

Table S6: Coordination-sphere bond lengths and angles for [Yb(L<sup>2</sup>)<sub>2</sub>(dbm)<sub>2</sub>]

|              |            |              |            |
|--------------|------------|--------------|------------|
| Yb(1)-O(145) | 2.247(2)   | Yb(2)-O(215) | 2.228(2)   |
| Yb(1)-O(115) | 2.256(2)   | Yb(2)-O(241) | 2.232(2)   |
| Yb(1)-O(111) | 2.2743(18) | Yb(2)-O(211) | 2.2841(19) |
| Yb(1)-O(141) | 2.2879(19) | Yb(2)-O(245) | 2.3051(19) |
| Yb(1)-N(182) | 2.452(2)   | Yb(2)-N(262) | 2.450(2)   |
| Yb(1)-N(162) | 2.466(2)   | Yb(2)-N(282) | 2.475(2)   |
| Yb(1)-N(171) | 2.478(2)   | Yb(2)-N(271) | 2.475(2)   |
| Yb(1)-N(191) | 2.509(2)   | Yb(2)-N(291) | 2.496(2)   |

|                     |           |                     |           |
|---------------------|-----------|---------------------|-----------|
| O(145)-Yb(1)-O(115) | 143.33(7) | O(215)-Yb(2)-O(241) | 146.07(7) |
| O(145)-Yb(1)-O(111) | 144.44(6) | O(215)-Yb(2)-O(211) | 72.39(7)  |
| O(115)-Yb(1)-O(111) | 72.20(7)  | O(241)-Yb(2)-O(211) | 141.34(7) |
| O(145)-Yb(1)-O(141) | 72.92(7)  | O(215)-Yb(2)-O(245) | 138.20(7) |
| O(115)-Yb(1)-O(141) | 143.75(6) | O(241)-Yb(2)-O(245) | 71.71(7)  |
| O(111)-Yb(1)-O(141) | 71.56(7)  | O(211)-Yb(2)-O(245) | 70.99(7)  |
| O(145)-Yb(1)-N(182) | 78.96(7)  | O(215)-Yb(2)-N(262) | 86.19(8)  |
| O(115)-Yb(1)-N(182) | 72.86(7)  | O(241)-Yb(2)-N(262) | 74.35(7)  |
| O(111)-Yb(1)-N(182) | 125.01(7) | O(211)-Yb(2)-N(262) | 127.04(7) |
| O(141)-Yb(1)-N(182) | 131.39(7) | O(245)-Yb(2)-N(262) | 132.63(7) |
| O(145)-Yb(1)-N(162) | 80.19(7)  | O(215)-Yb(2)-N(282) | 72.91(7)  |
| O(115)-Yb(1)-N(162) | 71.16(7)  | O(241)-Yb(2)-N(282) | 75.45(8)  |
| O(111)-Yb(1)-N(162) | 127.10(7) | O(211)-Yb(2)-N(282) | 136.24(7) |
| O(141)-Yb(1)-N(162) | 133.29(7) | O(245)-Yb(2)-N(282) | 124.53(7) |
| N(182)-Yb(1)-N(162) | 77.22(8)  | N(262)-Yb(2)-N(282) | 75.71(8)  |
| O(145)-Yb(1)-N(171) | 100.13(7) | O(215)-Yb(2)-N(271) | 110.12(8) |
| O(115)-Yb(1)-N(171) | 88.64(7)  | O(241)-Yb(2)-N(271) | 87.47(8)  |
| O(111)-Yb(1)-N(171) | 76.72(7)  | O(211)-Yb(2)-N(271) | 76.46(7)  |
| O(141)-Yb(1)-N(171) | 82.17(7)  | O(245)-Yb(2)-N(271) | 80.01(7)  |
| N(182)-Yb(1)-N(171) | 142.31(7) | N(262)-Yb(2)-N(271) | 66.35(8)  |
| N(162)-Yb(1)-N(171) | 65.66(7)  | N(282)-Yb(2)-N(271) | 141.40(7) |
| O(145)-Yb(1)-N(191) | 97.97(7)  | O(215)-Yb(2)-N(291) | 83.55(8)  |
| O(115)-Yb(1)-N(191) | 91.34(7)  | O(241)-Yb(2)-N(291) | 94.15(8)  |
| O(111)-Yb(1)-N(191) | 74.25(7)  | O(211)-Yb(2)-N(291) | 85.16(7)  |
| O(141)-Yb(1)-N(191) | 79.93(7)  | O(245)-Yb(2)-N(291) | 74.00(7)  |
| N(182)-Yb(1)-N(191) | 65.54(8)  | N(262)-Yb(2)-N(291) | 140.85(7) |
| N(162)-Yb(1)-N(191) | 142.24(8) | N(282)-Yb(2)-N(291) | 65.16(7)  |
| N(171)-Yb(1)-N(191) | 149.47(7) | N(271)-Yb(2)-N(291) | 151.95(7) |

Table S7: Coordination-sphere bond lengths and angles for [Tb(L<sup>2</sup>)<sub>2</sub>(dbm)<sub>2</sub>]

|              |            |              |            |
|--------------|------------|--------------|------------|
| Tb(1)-O(111) | 2.305(2)   | Tb(2)-O(211) | 2.0876(17) |
| Tb(1)-O(145) | 2.317(2)   | Tb(2)-O(245) | 2.1155(17) |
| Tb(1)-O(141) | 2.3224(18) | Tb(2)-O(241) | 2.2832(17) |
| Tb(1)-O(115) | 2.3316(18) | Tb(2)-O(215) | 2.2920(17) |
| Tb(1)-N(182) | 2.490(2)   | Tb(2)-N(272) | 2.605(2)   |
| Tb(1)-N(172) | 2.558(2)   | Tb(2)-N(282) | 2.607(2)   |
| Tb(1)-N(191) | 2.563(2)   | Tb(2)-N(261) | 2.734(2)   |
| Tb(1)-N(161) | 2.617(2)   | Tb(2)-N(291) | 2.792(2)   |

|                     |           |                     |           |
|---------------------|-----------|---------------------|-----------|
| O(111)-Tb(1)-O(145) | 145.70(6) | O(211)-Tb(2)-O(245) | 144.44(7) |
| O(111)-Tb(1)-O(141) | 142.40(6) | O(211)-Tb(2)-O(241) | 134.07(6) |
| O(145)-Tb(1)-O(141) | 71.90(6)  | O(245)-Tb(2)-O(241) | 74.88(6)  |
| O(111)-Tb(1)-O(115) | 70.66(6)  | O(211)-Tb(2)-O(215) | 74.52(6)  |
| O(145)-Tb(1)-O(115) | 143.59(6) | O(245)-Tb(2)-O(215) | 140.60(6) |
| O(141)-Tb(1)-O(115) | 71.77(7)  | O(241)-Tb(2)-O(215) | 67.80(6)  |
| O(111)-Tb(1)-N(182) | 80.26(7)  | O(211)-Tb(2)-N(272) | 88.33(7)  |
| O(145)-Tb(1)-N(182) | 73.15(7)  | O(245)-Tb(2)-N(272) | 74.93(7)  |
| O(141)-Tb(1)-N(182) | 126.71(7) | O(241)-Tb(2)-N(272) | 134.79(7) |
| O(115)-Tb(1)-N(182) | 129.57(6) | O(215)-Tb(2)-N(272) | 124.70(7) |
| O(111)-Tb(1)-N(172) | 65.61(6)  | O(211)-Tb(2)-N(282) | 72.32(7)  |
| O(145)-Tb(1)-N(172) | 87.64(7)  | O(245)-Tb(2)-N(282) | 74.00(7)  |
| O(141)-Tb(1)-N(172) | 137.97(6) | O(241)-Tb(2)-N(282) | 121.83(7) |
| O(115)-Tb(1)-N(172) | 121.87(7) | O(215)-Tb(2)-N(282) | 137.50(7) |
| N(182)-Tb(1)-N(172) | 78.00(7)  | N(272)-Tb(2)-N(282) | 80.12(7)  |
| O(111)-Tb(1)-N(191) | 100.13(7) | O(211)-Tb(2)-N(261) | 109.86(7) |
| O(145)-Tb(1)-N(191) | 87.93(7)  | O(245)-Tb(2)-N(261) | 89.54(8)  |
| O(141)-Tb(1)-N(191) | 74.93(7)  | O(241)-Tb(2)-N(261) | 85.66(7)  |
| O(115)-Tb(1)-N(191) | 80.54(7)  | O(215)-Tb(2)-N(261) | 75.78(7)  |
| N(182)-Tb(1)-N(191) | 64.85(7)  | N(272)-Tb(2)-N(261) | 61.31(7)  |
| N(172)-Tb(1)-N(191) | 142.23(7) | N(282)-Tb(2)-N(261) | 140.98(7) |
| O(111)-Tb(1)-N(161) | 77.49(7)  | O(211)-Tb(2)-N(291) | 81.74(7)  |
| O(145)-Tb(1)-N(161) | 110.14(7) | O(245)-Tb(2)-N(291) | 91.74(7)  |
| O(141)-Tb(1)-N(161) | 89.70(7)  | O(241)-Tb(2)-N(291) | 72.39(7)  |
| O(115)-Tb(1)-N(161) | 71.94(6)  | O(215)-Tb(2)-N(291) | 88.81(7)  |
| N(182)-Tb(1)-N(161) | 140.23(7) | N(272)-Tb(2)-N(291) | 140.97(7) |
| N(172)-Tb(1)-N(161) | 62.88(7)  | N(282)-Tb(2)-N(291) | 60.89(7)  |
| N(191)-Tb(1)-N(161) | 151.61(7) | N(261)-Tb(2)-N(291) | 156.83(6) |



Table S8: Coordination-sphere bond lengths and angles for the complex cation of  $[\text{Nd}(\text{L}^1)_2][\text{Nd}(\text{dbm})_4]$

|                     |           |                    |           |
|---------------------|-----------|--------------------|-----------|
| Nd(1)-N(32)         | 2.676(2)  | Nd(1)-N(41)        | 2.891(2)  |
| Nd(1)-N(52)         | 2.688(2)  | Nd(1)-N(61)        | 2.922(2)  |
| Nd(1)-N(12)         | 2.689(2)  | Nd(1)-N(21)        | 2.955(2)  |
| N(32)-Nd(1)-N(52)   | 112.86(6) | N(12)-Nd(1)-N(61A) | 64.01(6)  |
| N(32)-Nd(1)-N(52A)  | 67.14(6)  | N(41)-Nd(1)-N(61A) | 117.32(6) |
| N(32)-Nd(1)-N(12A)  | 67.33(6)  | N(32)-Nd(1)-N(61)  | 64.90(6)  |
| N(52)-Nd(1)-N(12A)  | 111.92(6) | N(52)-Nd(1)-N(61)  | 58.43(6)  |
| N(32)-Nd(1)-N(12)   | 112.67(6) | N(12)-Nd(1)-N(61)  | 115.99(6) |
| N(52)-Nd(1)-N(12)   | 68.08(6)  | N(41)-Nd(1)-N(61)  | 62.68(6)  |
| N(32)-Nd(1)-N(41)   | 58.79(6)  | N(61A)-Nd(1)-N(61) | 180.0     |
| N(52)-Nd(1)-N(41)   | 64.96(6)  | N(32)-Nd(1)-N(21)  | 115.22(6) |
| N(12)-Nd(1)-N(41)   | 64.59(6)  | N(32A)-Nd(1)-N(21) | 64.78(6)  |
| N(32)-Nd(1)-N(41A)  | 121.21(6) | N(52)-Nd(1)-N(21)  | 63.91(6)  |
| N(52)-Nd(1)-N(41A)  | 115.04(6) | N(52A)-Nd(1)-N(21) | 116.10(6) |
| N(12)-Nd(1)-N(41A)  | 115.41(6) | N(12)-Nd(1)-N(21)  | 121.61(6) |
| N(32)-Nd(1)-N(61A)  | 115.10(6) | N(41)-Nd(1)-N(21)  | 117.69(6) |
| N(52)-Nd(1)-N(61A)  | 121.57(6) | N(41A)-Nd(1)-N(21) | 62.31(6)  |
| N(52A)-Nd(1)-N(61A) | 58.43(6)  | N(61A)-Nd(1)-N(21) | 118.62(6) |
| N(12A)-Nd(1)-N(61A) | 115.99(6) | N(61)-Nd(1)-N(21)  | 61.38(6)  |
| N(21)-Nd(1)-N(21A)  | 180.0     | N(12)-Nd(1)-N(21A) | 58.39(6)  |

Figure S1: Molecular structure of the complex cation of  $[\text{Nd}(\text{L}^1)_2][\text{Nd}(\text{dbm})_4]$

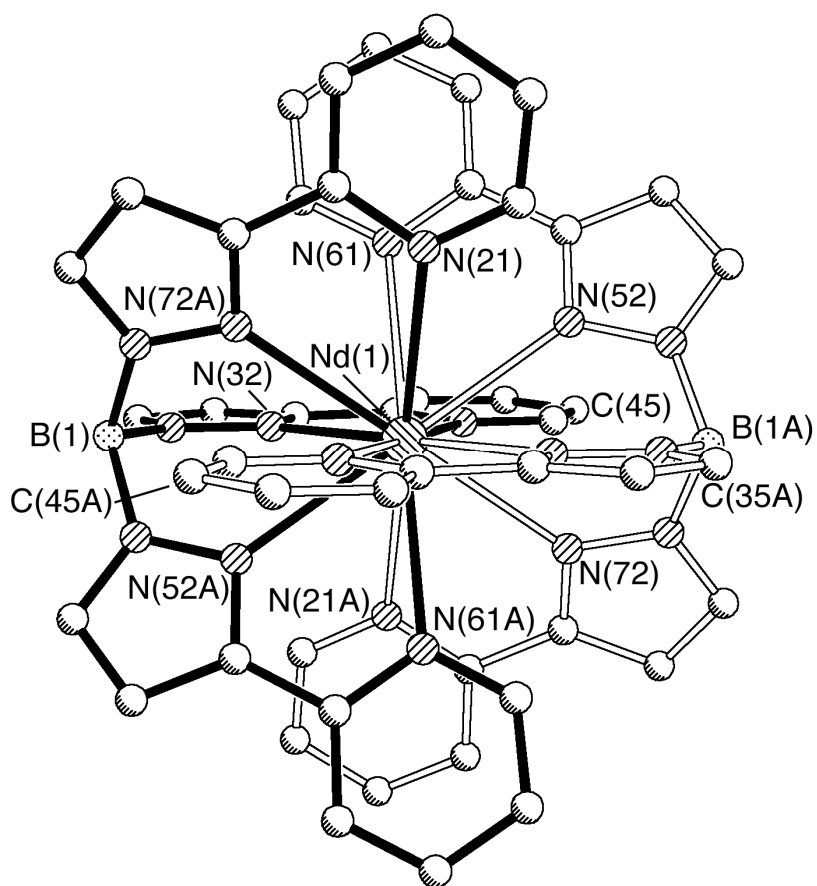

Supplement: b400992d.pdf [file b400992d.pdf]
